# Supplementary material
Source: Springer Nature journal article supplement (https://www.springermedizin.de/resource/supplementary/12889_2012_4490_MOESM1_ESM.pdf/9492662)

## Stakeholders

## Problem categories

## Competencies needed

The physician in charge

The concerned Health Care Unit

The Health Care System of the region

The patient and the employer

The Social Insurance Administration and legislation

Practitioner patient interaction

Work capacity assessment

Interaction with the Social Insurance Administration

The patient's workplace and the labour market

Sick-listing practice

Collaboration and resource allocation within the Health Care System

Leadership and routines at the Health Care Unit

Medical Expert

Communicator

Collaborator

Manager

Health Advocate

Scholar

Professional

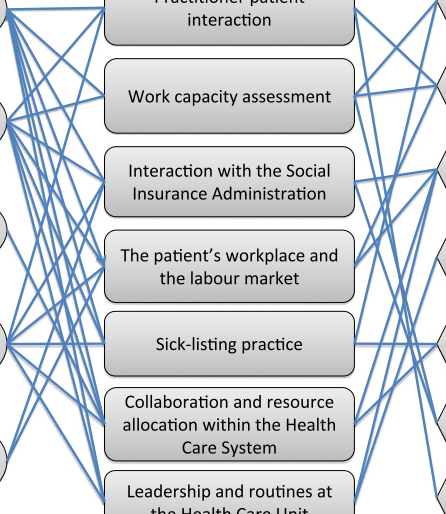

Supplement: MOESM1 [file 9492662]
